# Supplementary material
Source: MDPI journal article supplement (https://www.mdpi.com/search?q=plants-09-00813)
Supplement: s001 [file plants-09-00813-s001.pdf]

## Supplementary Materials

# Ethnomedicinal plant knowledge of the Karen in Thailand

Methee Phumthum, Rapeeporn Kantasrila, Sukhumaabhorn Kaewsangsai, Henrik Balslev, Angkhana Inta

### List of data sources

1. Anderson, E.F., 1993. *Plants and People of the Golden Triangle Ethnobotany of the Hill Tribes of Northern Thailand*. Timber Press, Inc., Southwest Portland.
2. Junkhonkaen, J., 2012. *ethnobotany of Ban Bowee, Amphoe Suan Phueng, Changwat Ratchaburi*. Master thesis, Kasetsart University, Kasetsart University Library, Bangkok.
3. Junsongduang, A., 2014. *Roles and importance of sacred Forest in biodiversity conservation in Mae Chaem District, Chiang Mai Province*. PhD thesis, Biology, Chiang Mai University Library, Chiang Mai.
4. Kaewsangsai S. *Ethnobotany of Karen in Khun Tuen Noi Village, Mae Tuen Sub-district, Omkoi District, Chiang Mai Province*. Master thesis. Chiang Mai: Chiang Mai University; 2017.
5. Kamwong, K., 2010. *Ethnobotany of Karens at Ban Mai Sawan and Ban Huay Pu Ling, Ban Luang Sub-District, Chom Thong District, Chiang Mai Province*, Master thesis, Biology. Chiang Mai University Library, Chiang Mai.
6. Kantasrila, R. *Ethnobotany of Karen at Ban Wa Do Kro, Mae Song Sub-district, Tha Song Yang District, Tak Province*. Master thesis. Chiang Mai: Chiang Mai University Library. 2016.
7. Klibai, A. 2013. *Self-care with indigenous medicine of long-eared Karen ethnic group: Case study Ban Mae Sin, Ban Kang Pinjai, Ban Slok, Wang Chin district, Phrae province*. Master thesis, Surin Rajabhat University.
8. Mahawongsanan, A., 2008. *Change of herbal plants utilization of the Pgn K'nyau : A case study of Ban Huay Som Poy, Mae Tia Watershed, Chom Thong District, Chiang Mai Province*. Master thesis, Biology. Chiang Mai University, Chiang Mai University Library.
9. Moonjai, J. *Ethnobotany of Ethnic Group in Mae La Noi District, Mae Hong Son Province*. Master's Thesis, Chiang Mai University, Chiang Mai, Thailand, 2017.
10. Prachuabaree, L., 2008. *Medicinal plants of Karang hill tribe in Baan Pong-lueg, Kaeng Krachan District, Phetchaburi Province*. Master thesis, Pharmacy. Silpakorn University, Nakhonpathom.
11. Pongamornkul, W. 2003. *An ethnobotanical study of the Karen at Ban Yang Pu Toh and Ban Yang Thung Pong, Chiang Dao district, Chiang Mai province*. Bachelor degree thesis, Biology. Chiang Mai University Library, Chiang Mai.
12. Puling, W. 2001. *Ethnobotany of Karen for studying medicinal plants at Angka Noi and Mae Klang villages, Chomthong district, Chiang Mai*. Bachelor degree thesis, Biology. Chiang Mai University Library, Chiang Mai.
13. Sonsupub, B., 2010. *Ethnobotany of karen community in Raipa village, Huaykhayeng subdistrict, Thongphapume district, Kanchanaburi province*. Master thesis, Horticulture. Kasetsart University, Bangkok.
14. Sukkho, T., 2008. *A survey of medicinal plants used by Karen people at Ban Chan and Chaem Luang Subdistricts, Mae Chaem district, Chiang Mai province*. Biology. Chiang Mai University Library, Chiang Mai.
15. Sutjaritjai, N., Wangpakapattanawong, P., Balslev, H. & Inta, A. 2019. Sutjaritjai, N., P. Wangpakapattanawong, H. Balslev and A. Inta (2019). "Traditional Uses of Leguminosae among the Karen in Thailand. *Plants* 8(12). <https://doi.org/10.3390/plants8120600>.

16. Tangjitman, K. Vulnerability prediction of medicinal plants used by Karen people in Chiang Mai province to climatic change using species distribution model (SDM). Doctor of Philosophy, Chiang Mai University, Chiang Mai, Thailand, 2014.
17. Tangjitman, K. Ethnobotany of the Karen at Huay Nam and Nong Ta Dang Villages, Tanaosri Subdistrict, Suanphuang District, Ratchaburi Province. Muban Chombueng Rajabhat University. 2016.
18. Trisonthi, S., Trisonthi, P. 1995. Ethnobotany of Karen in Mae Hae Nua village, Mae Na Jorn subdistrict, Mae Chaem district, Chiang Mai. Scientific report. CU Library, Bangkok.
19. Trisonthi, C.; Trisonthi, P. Ethnobotanical study in Thailand, a case study in Khun Yuam district Maehongson province. *Thai J Bot* **2009**, *1*, 1-23.
20. Winijchaiyanan, P., 1995. Ethnobotany of Karen in Chiang Mai. Master thesis, Biology. Chiang Mai University Library, Chiang Mai.

**Table S1** CI values of medicinal plants used by Karen in Thailand

| Species                                                   | CI   |
|-----------------------------------------------------------|------|
| <i>Abrus precatorius</i> L.                               | 0.03 |
| <i>Acacia catechu</i> (L.f.) Willd.                       | 0.03 |
| <i>Acacia concinna</i> (Willd.) DC.                       | 0.39 |
| <i>Acalypha kerrii</i> Craib                              | 0.03 |
| <i>Acalypha siamensis</i> Oliv. ex Gage                   | 0.03 |
| <i>Acalypha spiciflora</i> Burm.f.                        | 0.06 |
| <i>Acanthus montanus</i> (Nees) T.Anderson                | 0.06 |
| <i>Achyranthes aspera</i> L.                              | 0.16 |
| <i>Acmella oleracea</i> (L.) R.K.Jansen                   | 0.23 |
| <i>Acmella paniculata</i> (Wall. ex DC.) R.K.Jansen       | 0.06 |
| <i>Acorus calamus</i> L.                                  | 0.77 |
| <i>Acrocarpus fraxinifolius</i> Wight & Arn.              | 0.06 |
| <i>Actinodaphne henryi</i> Gamble                         | 0.03 |
| <i>Actinoscirpus grossus</i> (L.f.) Goetgh. & D.A.Simpson | 0.10 |
| <i>Adenanthera pavonina</i> L.                            | 0.06 |
| <i>Adenia viridiflora</i> Craib                           | 0.03 |
| <i>Aeginetia indica</i> L.                                | 0.10 |
| <i>Aegle marmelos</i> (L.) Corrêa                         | 0.03 |
| <i>Aeschynomene americana</i> L.                          | 0.06 |
| <i>Aesculus assamica</i> Griff.                           | 0.35 |
| <i>Afzelia xylocarpa</i> (Kurz) Craib                     | 0.03 |
| <i>Agapetes hosseana</i> Diels                            | 0.06 |
| <i>Agave americana</i> L.                                 | 0.03 |
| <i>Ageratina adenophora</i> (Spreng.) R.M.King & H.Rob.   | 0.48 |
| <i>Ageratum conyzoides</i> L.                             | 0.29 |
| <i>Aglaia elliptica</i> (C.DC.) Blume                     | 0.03 |
| <i>Aglaia lawii</i> (Wight) C.J.Saldanha                  | 0.06 |
| <i>Albizia chinensis</i> (Osbeck) Merr.                   | 0.03 |
| <i>Albizia procera</i> (Roxb.) Benth.                     | 0.03 |

|                                                                    |      |
|--------------------------------------------------------------------|------|
| <i>Alisma plantago-aquatica</i> L.                                 | 0.03 |
| <i>Allamanda cathartica</i> L.                                     | 0.03 |
| <i>Allium ascalonicum</i> L.                                       | 0.06 |
| <i>Allium sativum</i> L.                                           | 0.13 |
| <i>Aloe vera</i> (L.) Burm.f.                                      | 0.32 |
| <i>Alpinia galanga</i> (L.) Willd.                                 | 0.16 |
| <i>Alpinia malaccensis</i> (Burm.f.) Roscoe                        | 0.39 |
| <i>Alpinia roxburghii</i> Sweet                                    | 0.03 |
| <i>Alpinia zerumbet</i> (Pers.) B.L.Burtt & R.M.Sm.                | 0.13 |
| <i>Alstonia rostrata</i> C.E.C.Fisch.                              | 0.23 |
| <i>Alstonia scholaris</i> (L.) R.Br.                               | 0.52 |
| <i>Alternanthera sessilis</i> (L.) R.Br. ex DC.                    | 0.03 |
| <i>Amalocalyx microlobus</i> Pierre ex Spire                       | 0.10 |
| <i>Amaranthus blitum</i> L.                                        | 0.06 |
| <i>Amaranthus spinosus</i> L.                                      | 0.06 |
| <i>Amphineurion marginatum</i> (Roxb.) D.J.Middleton               | 0.13 |
| <i>Anacardium occidentale</i> L.                                   | 0.06 |
| <i>Anacolosa ilicoides</i> Mast.                                   | 0.03 |
| <i>Ananas comosus</i> (L.) Merr.                                   | 0.03 |
| <i>Anaxagorea luzonensis</i> A.Gray                                | 0.03 |
| <i>Andrographis paniculata</i> (Burm.f.) Nees                      | 0.16 |
| <i>Angiopteris evecta</i> (G.Forst.) Hoffm.                        | 0.32 |
| <i>Annona squamosa</i> L.                                          | 0.10 |
| <i>Anogeissus acuminata</i> (Roxb. ex DC.) Wall. ex Guill. & Perr. | 0.10 |
| <i>Anredera cordifolia</i> (Ten.) Steenis                          | 0.16 |
| <i>Antidesma acidum</i> Retz.                                      | 0.10 |
| <i>Antidesma bunioides</i> (L.) Spreng.                            | 0.03 |
| <i>Antidesma ghaesembilla</i> Gaertn.                              | 0.13 |
| <i>Antidesma sootepense</i> Craib                                  | 0.06 |
| <i>Aphaenandra uniflora</i> (Wall. ex G.Don) Bremek.               | 0.03 |
| <i>Aphananthe aspera</i> (Thunb.) Planch.                          | 0.03 |
| <i>Aporosa villosa</i> (Lindl.) Baill.                             | 0.06 |
| <i>Aquilaria crassna</i> Pierre ex Lecomte                         | 0.06 |
| <i>Aralia decaisneana</i> Hance                                    | 0.03 |
| <i>Archidendron clypearia</i> (Jack) I.C.Nielsen                   | 0.35 |
| <i>Ardisia polycephala</i> Wall. ex A.DC.                          | 0.06 |
| <i>Areca catechu</i> L.                                            | 0.13 |
| <i>Arisaema auriculatum</i> Buchet                                 | 0.03 |
| <i>Aristolochia tagala</i> Cham.                                   | 0.13 |
| <i>Artemisia atrovirens</i> Hand.-Mazz.                            | 0.19 |
| <i>Artemisia austroyunnanensis</i> Ling & Y.R.Ling                 | 0.06 |
| <i>Artocarpus gomezianus</i> Wall. ex Trécul                       | 0.03 |
| <i>Artocarpus heterophyllus</i> Lam.                               | 0.10 |

|                                                               |      |
|---------------------------------------------------------------|------|
| <i>Artocarpus hypargyreus</i> Hance ex Benth.                 | 0.03 |
| <i>Artocarpus lacucha</i> Buch.-Ham.                          | 0.06 |
| <i>Asparagus filicinus</i> Buch.-Ham. ex D.Don                | 0.39 |
| <i>Asparagus racemosus</i> Willd.                             | 0.06 |
| <i>Aspidistra elatior</i> Blume                               | 0.23 |
| <i>Asplenium nidus</i> L.                                     | 0.03 |
| <i>Averrhoa carambola</i> L.                                  | 0.13 |
| <i>Ayenia andamensis</i> (Kurz) Christenh. & Byng             | 0.03 |
| <i>Azadirachta indica</i> A.Juss.                             | 0.10 |
| <i>Baccaurea ramiflora</i> Lour.                              | 0.03 |
| <i>Baliospermum calycinum</i> Müll.Arg.                       | 0.10 |
| <i>Baliospermum solanifolium</i> (Burm.) Suresh               | 0.29 |
| <i>Bambusa bambos</i> (L.) Voss                               | 0.06 |
| <i>Barleria lupulina</i> Lindl.                               | 0.06 |
| <i>Barleria strigosa</i> Willd.                               | 0.06 |
| <i>Barringtonia macrostachya</i> (Jack) Kurz                  | 0.16 |
| <i>Basella alba</i> L.                                        | 0.03 |
| <i>Bauhinia nervosa</i> (Benth.) Baker                        | 0.03 |
| <i>Bauhinia ornata</i> Kurz                                   | 0.06 |
| <i>Bauhinia pulla</i> Craib                                   | 0.03 |
| <i>Benincasa hispida</i> (Thunb.) Cogn.                       | 0.03 |
| <i>Berberis napaulensis</i> (DC.) Spreng.                     | 0.03 |
| <i>Berchemia floribunda</i> (Wall.) Brongn.                   | 0.10 |
| <i>Betula alnoides</i> Buch.-Ham. ex D.Don                    | 0.68 |
| <i>Biancaea sappan</i> (L.) Tod.                              | 1.58 |
| <i>Bidens bipinnata</i> L.                                    | 0.03 |
| <i>Bidens pilosa</i> L.                                       | 0.29 |
| <i>Biophytum umbraculum</i> Welw.                             | 0.03 |
| <i>Bixa orellana</i> L.                                       | 0.03 |
| <i>Blainvillea acmella</i> (L.) Philipson                     | 0.03 |
| <i>Blumea balsamifera</i> (L.) DC.                            | 0.84 |
| <i>Blumea fistulosa</i> (Roxb.) Kurz                          | 0.03 |
| <i>Blumea lacera</i> (Burm.f.) DC.                            | 0.06 |
| <i>Boehmeria glomerulifera</i> Miq.                           | 0.03 |
| <i>Boesenbergia rotunda</i> (L.) Mansf.                       | 0.13 |
| <i>Brachypterum scandens</i> (Roxb.) Miq.                     | 0.03 |
| <i>Breynia androgyna</i> (L.) Chakrab. & N.P.Balacr.          | 0.13 |
| <i>Breynia quadrangularis</i> (Willd.) Chakrab. & N.P.Balacr. | 0.06 |
| <i>Breynia retusa</i> (Dennst.) Alston                        | 0.10 |
| <i>Breynia vitis-idaea</i> (Burm.f.) C.E.C.Fisch.             | 0.03 |
| <i>Bridelia glauca</i> Blume                                  | 0.03 |
| <i>Bridelia ovata</i> Decne.                                  | 0.03 |
| <i>Broussonetia papyrifera</i> (L.) L'Hér. ex Vent.           | 0.03 |

|                                                         |      |
|---------------------------------------------------------|------|
| <i>Brucea javanica</i> (L.) Merr.                       | 0.13 |
| <i>Brucea mollis</i> Wall. ex Kurz                      | 0.03 |
| <i>Bryophyllum pinnatum</i> (Lam.) Oken                 | 0.16 |
| <i>Buchanania cochinchinensis</i> (Lour.) M.R.Almeida   | 0.03 |
| <i>Buddleja asiatica</i> Lour.                          | 0.39 |
| <i>Buxus cochinchinensis</i> Pierre ex Gagnep.          | 0.03 |
| <i>Cajanus cajan</i> (L.) Huth                          | 0.16 |
| <i>Calanthe cardioglossa</i> Schltr.                    | 0.10 |
| <i>Callicarpa arborea</i> Roxb.                         | 0.10 |
| <i>Callicarpa rubella</i> Lindl.                        | 0.13 |
| <i>Calophyllum polyanthum</i> Wall. ex Choisy           | 0.03 |
| <i>Calotropis gigantea</i> (L.) W.T.Aiton               | 0.06 |
| <i>Camellia sinensis</i> (L.) Kuntze                    | 0.13 |
| <i>Cananga odorata</i> (Lam.) Hook. f. & Thomson        | 0.06 |
| <i>Canna indica</i> L.                                  | 0.23 |
| <i>Canscora andrographioides</i> Griff. ex C.B.Clarke   | 0.03 |
| <i>Capsicum annuum</i> L.                               | 0.03 |
| <i>Capsicum frutescens</i> L.                           | 0.03 |
| <i>Cardiospermum halicacabum</i> L.                     | 0.06 |
| <i>Careya arborea</i> Roxb.                             | 0.16 |
| <i>Carica papaya</i> L.                                 | 0.10 |
| <i>Cascabela thevetia</i> (L.) Lippold                  | 0.03 |
| <i>Cassia fistula</i> L.                                | 0.29 |
| <i>Cassytha filiformis</i> L.                           | 0.61 |
| <i>Catharanthus roseus</i> (L.) G.Don                   | 0.03 |
| <i>Causonis trifolia</i> (L.) Mabb. & J.Wen             | 0.03 |
| <i>Cayratia pedata</i> Gagnep.                          | 0.19 |
| <i>Celastrus paniculatus</i> Willd.                     | 0.16 |
| <i>Celosia argentea</i> L.                              | 0.03 |
| <i>Celtis tetrandra</i> Roxb.                           | 0.26 |
| <i>Celtis timorensis</i> Span.                          | 0.16 |
| <i>Centella asiatica</i> (L.) Urb.                      | 0.71 |
| <i>Centipeda minima</i> (L.) A.Braun & Asch.            | 0.03 |
| <i>Chionanthus ramiflorus</i> Roxb.                     | 0.03 |
| <i>Chisocheton cumingianus</i> (C.DC.) Harms            | 0.03 |
| <i>Chloranthus elatior</i> Link                         | 0.68 |
| <i>Chromolaena odorata</i> (L.) R.M.King & H.Rob.       | 1.61 |
| <i>Chrozophora tinctoria</i> (L.) A.Juss.               | 0.48 |
| <i>Cinnamomum camphora</i> (L.) J.Presl                 | 0.13 |
| <i>Cinnamomum iners</i> (Reinw. ex Nees & T.Nees) Blume | 0.03 |
| <i>Cinnamomum subavenium</i> Miq.                       | 0.19 |
| <i>Cissampelos hispida</i> Forman                       | 0.13 |
| <i>Cissus bicolor</i> Domin                             | 0.13 |

|                                                      |      |
|------------------------------------------------------|------|
| <i>Cissus discolor</i> Blume                         | 0.16 |
| <i>Cissus hastata</i> Miq.                           | 0.13 |
| <i>Cissus quadrangularis</i> L.                      | 0.06 |
| <i>Citrus × aurantiifolia</i> (Christm.) Swingle     | 0.23 |
| <i>Citrus × reticulata</i> Blanco                    | 0.03 |
| <i>Citrus cavaleriei</i> H.Lév. ex Cavalerie         | 0.06 |
| <i>Citrus hystrix</i> DC.                            | 0.10 |
| <i>Citrus maxima</i> (Burm.) Merr.                   | 0.03 |
| <i>Citrus medica</i> L.                              | 0.06 |
| <i>Clausena anisata</i> (Willd.) Hook. f. ex Benth.  | 0.06 |
| <i>Clausena excavata</i> Burm.f.                     | 0.23 |
| <i>Clausena harmandiana</i> (Pierre) Guillaumin      | 0.03 |
| <i>Clausena lenis</i> Drake                          | 0.03 |
| <i>Cleidion javanicum</i> Blume                      | 0.39 |
| <i>Clematis smilacifolia</i> Wall.                   | 0.16 |
| <i>Clerodendrum chinense</i> (Osbeck) Mabb.          | 0.06 |
| <i>Clerodendrum infortunatum</i> L.                  | 0.03 |
| <i>Clerodendrum japonicum</i> (Thunb.) Sweet         | 0.03 |
| <i>Clerodendrum nutans</i> Wall. ex Jack             | 0.10 |
| <i>Clerodendrum paniculatum</i> L.                   | 0.23 |
| <i>Clerodendrum petasites</i> (Lour.) S.Moore        | 0.13 |
| <i>Clinacanthus nutans</i> (Burm.f.) Lindau          | 0.03 |
| <i>Cnestis palala</i> (Lour.) Merr.                  | 0.10 |
| <i>Coccinia grandis</i> (L.) Voigt                   | 0.03 |
| <i>Cocculus laurifolius</i> DC.                      | 0.03 |
| <i>Cocos nucifera</i> L.                             | 0.06 |
| <i>Codariocalyx motorius</i> (Houtt.) H. Ohashi      | 0.10 |
| <i>Codiaeum variegatum</i> (L.) Rumph. ex A. Juss.   | 0.03 |
| <i>Coffea canephora</i> Pierre ex A. Froehner        | 0.03 |
| <i>Coix lacryma-jobi</i> L.                          | 0.58 |
| <i>Coleus amboinicus</i> Lour.                       | 0.26 |
| <i>Colocasia esculenta</i> (L.) Schott               | 0.03 |
| <i>Colquhounia elegans</i> Wall. ex Benth.           | 0.13 |
| <i>Combretum deciduum</i> Collett & Hemsl.           | 0.03 |
| <i>Combretum indicum</i> (L.) DeFilipps              | 0.13 |
| <i>Combretum procursum</i> Craib                     | 0.03 |
| <i>Combretum punctatum</i> Blume                     | 0.03 |
| <i>Commelina benghalensis</i> L.                     | 0.03 |
| <i>Commelina diffusa</i> Burm.f.                     | 0.03 |
| <i>Congea tomentosa</i> Roxb.                        | 0.03 |
| <i>Cordyline fruticosa</i> (L.) A. Chev.             | 0.06 |
| <i>Crassocephalum crepidioides</i> (Benth.) S. Moore | 0.03 |
| <i>Crateva adansonii</i> DC.                         | 0.03 |

|                                                             |      |
|-------------------------------------------------------------|------|
| <i>Crateva religiosa</i> G.Forst.                           | 0.16 |
| <i>Cratoxylum formosum</i> (Jack) Benth. & Hook. f. ex Dyer | 0.48 |
| <i>Crinum asiaticum</i> L.                                  | 0.13 |
| <i>Crotalaria alata</i> Buch.-Ham. ex D.Don                 | 0.06 |
| <i>Crotalaria albida</i> B.Heyne ex Roth                    | 0.03 |
| <i>Crotalaria assamica</i> Benth.                           | 0.03 |
| <i>Crotalaria breviflora</i> DC.                            | 0.13 |
| <i>Crotalaria pallida</i> Aiton                             | 0.03 |
| <i>Crotalaria sessiliflora</i> L.                           | 0.03 |
| <i>Crotalaria verrucosa</i> L.                              | 0.06 |
| <i>Croton acutifolius</i> Esser                             | 0.03 |
| <i>Croton kongensis</i> Gagnep.                             | 0.10 |
| <i>Croton persimilis</i> Müll.Arg.                          | 0.23 |
| <i>Croton robustus</i> Kurz                                 | 0.06 |
| <i>Croton sepalinus</i> Airy Shaw                           | 0.06 |
| <i>Croton stellatopilosus</i> H.Ohba                        | 0.03 |
| <i>Curculigo capitulata</i> (Lour.) Kuntze                  | 0.10 |
| <i>Curculigo latifolia</i> Dryand. ex W.T.Aiton             | 0.19 |
| <i>Curcuma aeruginosa</i> Roxb.                             | 0.23 |
| <i>Curcuma elata</i> Roxb.                                  | 0.06 |
| <i>Curcuma longa</i> L.                                     | 0.94 |
| <i>Curcuma mangga</i> Valetton & Zijp                       | 0.03 |
| <i>Curcuma sessilis</i> Gage                                | 0.03 |
| <i>Curcuma zedoaria</i> (Christm.) Roscoe                   | 0.23 |
| <i>Cuscuta chinensis</i> Lam.                               | 0.26 |
| <i>Cyanthillium cinereum</i> (L.) H.Rob.                    | 0.06 |
| <i>Cycas siamensis</i> Miq.                                 | 0.03 |
| <i>Cyclea barbata</i> Miers                                 | 0.55 |
| <i>Cyclocodon lancifolius</i> (Roxb.) Kurz                  | 0.16 |
| <i>Cymbidium bicolor</i> Lindl.                             | 0.10 |
| <i>Cymbidium haematodes</i> Lindl.                          | 0.03 |
| <i>Cymbopogon citratus</i> (DC.) Stapf                      | 0.23 |
| <i>Cymbopogon nardus</i> (L.) Rendle                        | 0.10 |
| <i>Cyperus rotundus</i> L.                                  | 0.03 |
| <i>Dactylicapnos scandens</i> (D.Don) Hutch.                | 0.13 |
| <i>Dactyloctenium aegyptium</i> (L.) Willd.                 | 0.03 |
| <i>Dalbergia cana</i> Graham ex Kurz                        | 0.03 |
| <i>Dalbergia cultrata</i> T.S.Ralph                         | 0.06 |
| <i>Dalbergia foliacea</i> Wall. ex Benth.                   | 0.03 |
| <i>Dalbergia ovata</i> Graham ex Benth.                     | 0.10 |
| <i>Dalbergia retusa</i> Hemsl.                              | 0.03 |
| <i>Dalbergia stipulacea</i> Roxb.                           | 0.19 |
| <i>Dalbergia velutina</i> Benth.                            | 0.06 |

|                                                              |      |
|--------------------------------------------------------------|------|
| <i>Dalrympelea pomifera</i> Roxb.                            | 0.16 |
| <i>Datura metel</i> L.                                       | 0.06 |
| <i>Dendrocalamus brandisii</i> (Munro) Kurz                  | 0.10 |
| <i>Dendrocalamus hamiltonii</i> Nees & Arn. ex Munro         | 0.13 |
| <i>Dendrocalamus strictus</i> (Roxb.) Nees                   | 0.10 |
| <i>Dendrophthoe pentandra</i> (L.) Miq.                      | 0.16 |
| <i>Derris elliptica</i> (Wall.) Benth.                       | 0.26 |
| <i>Derris montana</i> Benth.                                 | 0.03 |
| <i>Desmodium oblongum</i> Wall. ex Benth.                    | 0.19 |
| <i>Desmodium velutinum</i> (Willd.) DC.                      | 0.06 |
| <i>Desmos dumosus</i> (Roxb.) Saff.                          | 0.06 |
| <i>Desmos macrocarpus</i> Bân                                | 0.13 |
| <i>Dianella ensifolia</i> (L.) Redouté                       | 0.03 |
| <i>Dienia ophrydis</i> (J.Koenig) Seidenf.                   | 0.03 |
| <i>Dillenia indica</i> L.                                    | 0.03 |
| <i>Dillenia parviflora</i> Griff.                            | 0.03 |
| <i>Dillenia pentagyna</i> Roxb.                              | 0.03 |
| <i>Dimetia ampliflora</i> (Hance) Neupane & N.Wikstr.        | 0.16 |
| <i>Dioscorea hispida</i> Dennst.                             | 0.16 |
| <i>Diospyros areolata</i> King & Gamble                      | 0.03 |
| <i>Diospyros castanea</i> (Craib) H.R.Fletcher               | 0.06 |
| <i>Diospyros glandulosa</i> Lace                             | 0.03 |
| <i>Diospyros kaki</i> L.f.                                   | 0.06 |
| <i>Diospyros mollis</i> Griff.                               | 0.03 |
| <i>Diospyros rhodocalyx</i> Kurz                             | 0.03 |
| <i>Diplazium esculentum</i> (Retz.) Sw.                      | 0.06 |
| <i>Dipterocarpus obtusifolius</i> Teijsm. ex Miq.            | 0.06 |
| <i>Dischidia imbricata</i> (Blume) Steud.                    | 0.03 |
| <i>Dischidia major</i> (Vahl) Merr.                          | 0.03 |
| <i>Dischidia nummularia</i> R.Br.                            | 0.35 |
| <i>Disporum calcaratum</i> D.Don                             | 0.03 |
| <i>Dolichandrone serrulata</i> (Wall. ex DC.) Seem.          | 0.03 |
| <i>Dracaena angustifolia</i> (Medik.) Roxb.                  | 0.03 |
| <i>Dracaena cochinchinensis</i> (Lour.) S.C.Chen             | 0.03 |
| <i>Dracaena conferta</i> Ridl.                               | 0.03 |
| <i>Dracaena fragrans</i> (L.) Ker Gawl.                      | 0.06 |
| <i>Dracaena terniflora</i> Roxb.                             | 0.10 |
| <i>Dracontomelon dao</i> (Blanco) Merr. & Rolfe              | 0.03 |
| <i>Drymaria cordata</i> (L.) Willd. ex Schult.               | 0.10 |
| <i>Drynaria quercifolia</i> (L.) J.Sm.                       | 0.13 |
| <i>Duabanga grandiflora</i> (Roxb. ex DC.) Walp.             | 0.16 |
| <i>Duhaldea cappa</i> (Buch.-Ham. ex D.Don) Pruski & Anderb. | 0.71 |
| <i>Dunbaria bella</i> Prain                                  | 0.03 |



|                                                        |      |
|--------------------------------------------------------|------|
| <i>Dysoxylum excelsum</i> Blume                        | 0.03 |
| <i>Dysoxylum grande</i> Hiern                          | 0.26 |
| <i>Elaeagnus latifolia</i> L.                          | 0.03 |
| <i>Elephantopus scaber</i> L.                          | 1.26 |
| <i>Eleusine indica</i> (L.) Gaertn.                    | 0.06 |
| <i>Eleutherine bulbosa</i> (Mill.) Urb.                | 0.45 |
| <i>Eleutherococcus trifoliatu</i> s (L.) S.Y.Hu        | 0.03 |
| <i>Elytranthe albida</i> (Blume) Blume                 | 0.03 |
| <i>Embelia ribes</i> Burm.f.                           | 0.13 |
| <i>Embelia sessiliflora</i> Kurz                       | 0.29 |
| <i>Embelia tsjeriam-cottam</i> (Roem. & Schult.) A.DC. | 0.03 |
| <i>Engelhardia spicata</i> Lechen ex Blume             | 0.13 |
| <i>Ensete glaucum</i> (Roxb.) Cheesman                 | 0.16 |
| <i>Entada glandulosa</i> Pierre ex Gagnep.             | 0.13 |
| <i>Entada rheedei</i> Spreng.                          | 0.13 |
| <i>Equisetum debile</i> Roxb. ex Vaucher               | 0.13 |
| <i>Eriosema chinense</i> Vogel                         | 0.03 |
| <i>Eryngium foetidum</i> L.                            | 0.10 |
| <i>Erythrina stricta</i> Roxb.                         | 0.06 |
| <i>Erythrina subumbrans</i> (Hassk.) Merr.             | 0.23 |
| <i>Etlingera elatior</i> (Jack) R.M.Sm.                | 0.03 |
| <i>Eupatorium fortunei</i> Turcz.                      | 0.06 |
| <i>Euphorbia heterophylla</i> L.                       | 0.19 |
| <i>Euphorbia hirta</i> L.                              | 0.23 |
| <i>Euphorbia tirucalli</i> L.                          | 0.03 |
| <i>Eurycoma longifolia</i> Jack                        | 0.16 |
| <i>Exacum pteranthum</i> Wall. ex G.Don                | 0.03 |
| <i>Falconeria insignis</i> Royle                       | 0.13 |
| <i>Fernandoa adenophylla</i> (Wall. ex G.Don) Steenis  | 0.06 |
| <i>Ficus auriculata</i> Lour.                          | 0.26 |
| <i>Ficus capillipes</i> Gagnep.                        | 0.03 |
| <i>Ficus fistulosa</i> Reinw. ex Blume                 | 0.03 |
| <i>Ficus heterophylla</i> L.f.                         | 0.03 |
| <i>Ficus hispida</i> L.f.                              | 0.19 |
| <i>Ficus racemosa</i> L.                               | 0.13 |
| <i>Ficus sarmentosa</i> Buch.-Ham. ex Sm.              | 0.03 |
| <i>Ficus semicordata</i> Buch.-Ham. ex Sm.             | 0.03 |
| <i>Ficus virens</i> Aiton                              | 0.03 |
| <i>Flacourtia indica</i> (Burm.f.) Merr.               | 0.26 |
| <i>Flacourtia jangomas</i> (Lour.) Raeusch.            | 0.13 |
| <i>Flacourtia rukam</i> Zoll. & Moritzi                | 0.03 |
| <i>Flemingia ferruginea</i> Wall. ex Benth.            | 0.03 |
| <i>Flemingia lineata</i> (L.) Aiton                    | 0.16 |

|                                                       |      |
|-------------------------------------------------------|------|
| <i>Flemingia macrophylla</i> (Willd.) Kuntze ex Merr. | 0.16 |
| <i>Flemingia paniculata</i> Wall. ex Benth.           | 0.03 |
| <i>Flemingia semialata</i> Roxb. ex W.T.Aiton         | 0.06 |
| <i>Flemingia stricta</i> Roxb.                        | 0.10 |
| <i>Flemingia strobilifera</i> (L.) W.T.Aiton          | 0.16 |
| <i>Flueggea leucopyrus</i> Willd.                     | 0.26 |
| <i>Flueggea virosa</i> (Roxb. ex Willd.) Royle        | 0.03 |
| <i>Fraxinus griffithii</i> C.B.Clarke                 | 0.06 |
| <i>Garcinia xanthochymus</i> Hook. f. ex T.Anderson   | 0.03 |
| <i>Gardenia jasminoides</i> J.Ellis                   | 0.03 |
| <i>Garuga pinnata</i> Roxb.                           | 0.03 |
| <i>Getonia floribunda</i> Roxb.                       | 0.03 |
| <i>Gigantochloa albociliata</i> (Munro) Kurz          | 0.06 |
| <i>Glinus herniarioides</i> (Gagnep.) Tardieu         | 0.03 |
| <i>Gluta usitata</i> (Wall.) Ding Hou                 | 0.03 |
| <i>Glycine max</i> (L.) Merr.                         | 0.03 |
| <i>Glycosmis pentaphylla</i> (Retz.) DC.              | 0.03 |
| <i>Gmelina arborea</i> Roxb. ex Sm.                   | 0.81 |
| <i>Gnetum montanum</i> Markgr.                        | 0.10 |
| <i>Gomphrena celosioides</i> Mart.                    | 0.03 |
| <i>Gomphrena globosa</i> L.                           | 0.06 |
| <i>Gonocaryum lobbianum</i> (Miers) Kurz              | 0.06 |
| <i>Grammatophyllum speciosum</i> Blume                | 0.16 |
| <i>Gynostemma pentaphyllum</i> (Thunb.) Makino        | 0.03 |
| <i>Gynura bicolor</i> (Roxb. ex Willd.) DC.           | 0.03 |
| <i>Harrisonia perforata</i> (Blanco) Merr.            | 0.23 |
| <i>Hedychium coronarium</i> J.Koenig                  | 0.06 |
| <i>Hedychium flavum</i> Roxb.                         | 0.03 |
| <i>Hedyotis pruinosa</i> Wight & Arn.                 | 0.03 |
| <i>Helicia nilagirica</i> Bedd.                       | 0.13 |
| <i>Heliciopsis terminalis</i> (Kurz) Sleumer          | 0.16 |
| <i>Helicteres elongata</i> Wall. ex Mast.             | 0.29 |
| <i>Helicteres hirsuta</i> Lour.                       | 0.03 |
| <i>Heliotropium indicum</i> L.                        | 0.10 |
| <i>Hellenia speciosa</i> (J.Koenig) S.R.Dutta         | 0.58 |
| <i>Hemigraphis glaucescens</i> (Nees) C.B.Clarke      | 0.03 |
| <i>Henslowia collettii</i> Gamble                     | 0.10 |
| <i>Henslowia sessilis</i> Craib                       | 0.13 |
| <i>Heteropanax fragrans</i> (Roxb.) Seem.             | 0.06 |
| <i>Hibiscus rosa-sinensis</i> L.                      | 0.03 |
| <i>Hibiscus sabdariffa</i> L.                         | 0.03 |
| <i>Hippochaete debilis</i> (Roxb. ex Vaucher) Holub   | 0.42 |
| <i>Hiptage benghalensis</i> (L.) Kurz                 | 0.29 |

|                                                            |      |
|------------------------------------------------------------|------|
| <i>Hiptage candicans</i> Hook.f.                           | 0.06 |
| <i>Holarrhena pubescens</i> Wall. ex G.Don                 | 0.10 |
| <i>Homonoia riparia</i> Lour.                              | 0.03 |
| <i>Hopea helferi</i> (Dyer) Brandis                        | 0.03 |
| <i>Hopea odorata</i> Roxb.                                 | 0.03 |
| <i>Horsfieldia amygdalina</i> (Wall.) Warb.                | 0.03 |
| <i>Houttuynia cordata</i> Thunb.                           | 0.23 |
| <i>Huangtcia renifolia</i> (L.) H.Ohashi & K.Ohashi        | 0.03 |
| <i>Hultholia mimosoides</i> (Lam.) Gagnon & G.P.Lewis      | 0.03 |
| <i>Hydnocarpus ilicifolius</i> King                        | 0.03 |
| <i>Hydrocotyle javanica</i> Thunb.                         | 0.23 |
| <i>Hydrocotyle umbellata</i> L.                            | 0.03 |
| <i>Hymenasplenium apogamum</i> (N.Murak. & Hatan.) Nakaike | 0.03 |
| <i>Hymenasplenium obscurum</i> (Blume) Tagawa              | 0.03 |
| <i>Hymenodictyon orixense</i> (Roxb.) Mabb.                | 0.06 |
| <i>Hypoestes phyllostachya</i> Baker                       | 0.10 |
| <i>Ilex umbellulata</i> (Wall.) Loes.                      | 0.03 |
| <i>Illigera trifoliata</i> (Griff.) Dunn                   | 0.19 |
| <i>Impatiens muscicola</i> Craib                           | 0.06 |
| <i>Imperata cylindrica</i> (L.) P.Beauv.                   | 0.39 |
| <i>Indigofera caloneura</i> Kurz                           | 0.13 |
| <i>Indigofera hendecaphylla</i> Jacq.                      | 0.06 |
| <i>Indigofera tinctoria</i> L.                             | 0.03 |
| <i>Ipomoea aquatica</i> Forssk.                            | 0.03 |
| <i>Ipomoea batatas</i> (L.) Lam.                           | 0.06 |
| <i>Ipomoea quamoclit</i> L.                                | 0.03 |
| <i>Iris domestica</i> (L.) Goldblatt & Mabb.               | 0.03 |
| <i>Ixora cibdela</i> Craib                                 | 0.03 |
| <i>Ixora henryi</i> H.Lév.                                 | 0.13 |
| <i>Ixora lobbii</i> Loudon ex King & Gamble                | 0.03 |
| <i>Jasminum decussatum</i> Wall. ex G.Don                  | 0.10 |
| <i>Jasminum laurifolium</i> Roxb. ex Hornem.               | 0.10 |
| <i>Jasminum simplicifolium</i> G.Forst.                    | 0.03 |
| <i>Jatropha curcas</i> L.                                  | 0.35 |
| <i>Jatropha podagrica</i> Hook.                            | 0.13 |
| <i>Justicia adhatoda</i> L.                                | 0.03 |
| <i>Justicia fragilis</i> Dennst.                           | 0.06 |
| <i>Justicia gendarussa</i> Burm.f.                         | 0.29 |
| <i>Kaempferia galanga</i> L.                               | 0.10 |
| <i>Kaempferia parviflora</i> Wall. ex Baker                | 0.32 |
| <i>Kaempferia rotunda</i> L.                               | 0.10 |
| <i>Kopsia arborea</i> Blume                                | 0.13 |
| <i>Lablab purpureus</i> (L.) Sweet                         | 0.10 |

|                                                            |      |
|------------------------------------------------------------|------|
| <i>Lagerstroemia calyculata</i> Kurz                       | 0.10 |
| <i>Lagerstroemia floribunda</i> Jack                       | 0.03 |
| <i>Lagerstroemia speciosa</i> (L.) Pers.                   | 0.03 |
| <i>Lansea coromandelica</i> (Houtt.) Merr.                 | 0.03 |
| <i>Lantana camara</i> L.                                   | 0.10 |
| <i>Lasia spinosa</i> (L.) Thwaites                         | 0.03 |
| <i>Leea indica</i> (Burm.f.) Merr.                         | 0.29 |
| <i>Leonotis nepetifolia</i> (L.) R.Br.                     | 0.03 |
| <i>Lepisanthes senegalensis</i> (Poir.) Leenh.             | 0.03 |
| <i>Leucaena leucocephala</i> (Lam.) de Wit                 | 0.19 |
| <i>Lilium primulinum</i> Baker                             | 0.06 |
| <i>Limnophila aromatica</i> (Lam.) Merr.                   | 0.10 |
| <i>Litsea cubeba</i> (Lour.) Pers.                         | 0.81 |
| <i>Lophopetalum wallichii</i> Kurz                         | 0.03 |
| <i>Ludwigia hyssopifolia</i> (G.Don) Exell                 | 0.03 |
| <i>Luffa cylindrica</i> (L.) M.Roem.                       | 0.03 |
| <i>Lycopodiella cernua</i> (L.) Pic.Serm.                  | 0.06 |
| <i>Lygodium flexuosum</i> (L.) Sw.                         | 0.45 |
| <i>Macaranga denticulata</i> (Blume) Müll.Arg.             | 0.03 |
| <i>Maclura cochinchinensis</i> (Lour.) Corner              | 0.03 |
| <i>Maesa glomerata</i> K.Larsen & C.M.Hu                   | 0.06 |
| <i>Maesa junghuhniana</i> Scheff.                          | 0.06 |
| <i>Maesa ramentacea</i> (Roxb.) A.DC.                      | 0.03 |
| <i>Magnolia garrettii</i> (Craib) V.S.Kumar                | 0.03 |
| <i>Mallotus philippensis</i> (Lam.) Müll.Arg.              | 0.16 |
| <i>Mangifera indica</i> L.                                 | 0.06 |
| <i>Mangifera quadrifida</i> Jack                           | 0.06 |
| <i>Mansoa alliacea</i> (Lam.) A.H.Gentry                   | 0.03 |
| <i>Maranta arundinacea</i> L.                              | 0.10 |
| <i>Markhamia stipulata</i> (Wall.) Seem.                   | 0.26 |
| <i>Martynia annua</i> L.                                   | 0.06 |
| <i>Mayodendron igneum</i> (Kurz) Kurz                      | 0.06 |
| <i>Melastoma malabathricum</i> L.                          | 0.26 |
| <i>Melastoma sanguineum</i> Sims                           | 0.13 |
| <i>Melia azedarach</i> L.                                  | 0.06 |
| <i>Melicope glomerata</i> (Craib) T.G.Hartley              | 0.48 |
| <i>Melicope pteleifolia</i> (Champ. ex Benth.) T.G.Hartley | 0.23 |
| <i>Meliosma pinnata</i> (Roxb.) Maxim.                     | 0.03 |
| <i>Memecylon pauciflorum</i> Blume                         | 0.10 |
| <i>Mentha × villosa</i> Huds.                              | 0.16 |
| <i>Mesosphaerum suaveolens</i> (L.) Kuntze                 | 0.03 |
| <i>Microcos paniculata</i> L.                              | 0.19 |
| <i>Microcos sinuata</i> (Wall. ex Mast.) Burret            | 0.03 |

|                                                                       |      |
|-----------------------------------------------------------------------|------|
| <i>Microcos tomentosa</i> Sm.                                         | 0.06 |
| <i>Microglossa pyrifolia</i> (Lam.) Kuntze                            | 0.06 |
| <i>Microlepis matthewii</i> Christ                                    | 0.06 |
| <i>Micromelum integerrimum</i> (Roxb. ex DC.) Wight & Arn. ex M.Roem. | 0.06 |
| <i>Micromelum minutum</i> (G.Forst.) Wight & Arn.                     | 0.13 |
| <i>Microtoena insuavis</i> (Hance) Prain ex Briq.                     | 0.06 |
| <i>Mikania cordata</i> (Burm.f.) B.L.Rob.                             | 0.03 |
| <i>Miliusa thorelii</i> Finet & Gagnep.                               | 0.77 |
| <i>Miliusa velutina</i> (DC.) Hook.f. & Thomson                       | 0.10 |
| <i>Millettia brandisiana</i> Kurz                                     | 0.03 |
| <i>Millettia caerulea</i> Baker                                       | 0.06 |
| <i>Millettia extensa</i> (Benth.) Benth. ex Baker                     | 0.03 |
| <i>Millettia pachycarpa</i> Benth.                                    | 0.06 |
| <i>Millingtonia hortensis</i> L.f.                                    | 0.29 |
| <i>Mimosa diplotricha</i> C.Wright                                    | 0.06 |
| <i>Mimosa pigra</i> L.                                                | 0.97 |
| <i>Mirabilis jalapa</i> L.                                            | 0.03 |
| <i>Mitragyna hirsuta</i> Havil.                                       | 0.03 |
| <i>Mitragyna rotundifolia</i> (Roxb.) Kuntze                          | 0.06 |
| <i>Momordica charantia</i> L.                                         | 0.23 |
| <i>Momordica cochinchinensis</i> (Lour.) Spreng.                      | 0.10 |
| <i>Monosis volkameriifolia</i> (DC.) H.Rob. & Skvarla                 | 0.10 |
| <i>Morinda angustifolia</i> Roxb.                                     | 0.10 |
| <i>Morinda citrifolia</i> L.                                          | 0.13 |
| <i>Morinda coreia</i> Buch.-Ham.                                      | 0.03 |
| <i>Moringa oleifera</i> Lam.                                          | 0.03 |
| <i>Morus alba</i> L.                                                  | 0.19 |
| <i>Morus macroura</i> Miq.                                            | 0.10 |
| <i>Mucuna macrocarpa</i> Wall.                                        | 0.13 |
| <i>Mucuna pruriens</i> (L.) DC.                                       | 0.16 |
| <i>Muehlenbeckia platyclados</i> (F.Muell.) Meisn.                    | 0.03 |
| <i>Muntingia calabura</i> L.                                          | 0.03 |
| <i>Murraya koenigii</i> (L.) Spreng.                                  | 0.03 |
| <i>Murraya paniculata</i> (L.) Jack                                   | 0.03 |
| <i>Musa × paradisiaca</i> L.                                          | 0.26 |
| <i>Musa acuminata</i> Colla                                           | 0.23 |
| <i>Mussaenda kerrii</i> Craib                                         | 0.03 |
| <i>Mussaenda sanderiana</i> Ridl.                                     | 0.52 |
| <i>Myriopteron extensum</i> (Wight) K.Schum.                          | 0.03 |
| <i>Nauclea orientalis</i> (L.) L.                                     | 0.13 |
| <i>Nicotiana tabacum</i> L.                                           | 0.06 |
| <i>Nyctocalos brunfelsiiflorum</i> Teijsm. & Binn.                    | 0.19 |
| <i>Nymphaea lotus</i> L.                                              | 0.03 |

|                                                |      |
|------------------------------------------------|------|
| <i>Ochna integerrima</i> (Lour.) Merr.         | 0.35 |
| <i>Ocimum americanum</i> L.                    | 0.06 |
| <i>Ocimum basilicum</i> L.                     | 0.03 |
| <i>Ocimum gratissimum</i> L.                   | 0.19 |
| <i>Ocimum tenuiflorum</i> L.                   | 0.13 |
| <i>Ocotea lancifolia</i> (Schott) Mez          | 0.03 |
| <i>Oenanthe javanica</i> (Blume) DC.           | 0.06 |
| <i>Ophiopogon yunnanensis</i> S.C.Chen         | 0.03 |
| <i>Oroxylum indicum</i> (L.) Kurz              | 0.52 |
| <i>Orthosiphon aristatus</i> (Blume) Miq.      | 0.13 |
| <i>Oryza sativa</i> L.                         | 0.06 |
| <i>Osbeckia chinensis</i> L.                   | 0.26 |
| <i>Oxalis acetosella</i> L.                    | 0.03 |
| <i>Oxyceros bispinosus</i> (Griff.) Tirveng.   | 0.03 |
| <i>Paederia foetida</i> L.                     | 0.13 |
| <i>Paederia linearis</i> Hook.f.               | 0.06 |
| <i>Paederia pallida</i> Craib                  | 0.03 |
| <i>Paederia pilifera</i> Hook.f.               | 0.06 |
| <i>Pandanus amaryllifolius</i> Roxb. ex Lindl. | 0.10 |
| <i>Papaver somniferum</i> L.                   | 0.10 |
| <i>Paris polyphylla</i> Sm.                    | 0.42 |
| <i>Passiflora foetida</i> L.                   | 0.06 |
| <i>Pavetta indica</i> L.                       | 0.10 |
| <i>Pavetta tomentosa</i> Roxb. ex Sm.          | 0.03 |
| <i>Peliosanthes caesia</i> J.M.H.Shaw          | 0.16 |
| <i>Peliosanthes macrophylla</i> Wall. ex Baker | 0.16 |
| <i>Peliosanthes tetra</i> Andrews              | 0.06 |
| <i>Peperomia pellucida</i> (L.) Kunth          | 0.16 |
| <i>Persicaria barbata</i> (L.) H.Hara          | 0.06 |
| <i>Persicaria odorata</i> (Lour.) Soják        | 0.03 |
| <i>Phlogacanthus curviflorus</i> (Nees) Nees   | 0.35 |
| <i>Phrynium pubinerve</i> Blume                | 0.06 |
| <i>Phyllanthus acidus</i> (L.) Skeels          | 0.10 |
| <i>Phyllanthus amarus</i> Schumach. & Thonn.   | 0.32 |
| <i>Phyllanthus elegans</i> Wall. ex Müll.Arg.  | 0.03 |
| <i>Phyllanthus emblica</i> L.                  | 0.48 |
| <i>Phyllanthus sphaerogynus</i> Müll.Arg.      | 0.03 |
| <i>Phyllodium longipes</i> (Craib) Schindl.    | 0.06 |
| <i>Phyllodium pulchellum</i> (L.) Desv.        | 0.26 |
| <i>Physalis angulata</i> L.                    | 0.16 |
| <i>Phytolacca acinosa</i> Roxb.                | 0.03 |
| <i>Picrasma javanica</i> Blume                 | 0.29 |
| <i>Pinus kesiya</i> Royle ex Gordon            | 0.10 |

|                                                                  |      |
|------------------------------------------------------------------|------|
| <i>Piper betle</i> L.                                            | 0.29 |
| <i>Piper boehmeriifolium</i> (Miq.) Wall. ex C.DC.               | 0.06 |
| <i>Piper interruptum</i> Opiz                                    | 0.29 |
| <i>Piper nigrum</i> L.                                           | 0.10 |
| <i>Piper retrofractum</i> Vahl                                   | 0.16 |
| <i>Piper sarmentosum</i> Roxb.                                   | 0.16 |
| <i>Pittosporopsis kerrii</i> Craib                               | 0.03 |
| <i>Plantago major</i> L.                                         | 0.81 |
| <i>Platycerium wallichii</i> Hook.                               | 0.19 |
| <i>Plumbago indica</i> L.                                        | 0.45 |
| <i>Plumbago zeylanica</i> L.                                     | 0.26 |
| <i>Plumeria obtusa</i> L.                                        | 0.29 |
| <i>Plumeria rubra</i> L.                                         | 0.13 |
| <i>Poikilospermum suaveolens</i> (Blume) Merr.                   | 0.03 |
| <i>Polygala arillata</i> Buch.-Ham. ex D.Don                     | 0.23 |
| <i>Polygala chinensis</i> L.                                     | 0.19 |
| <i>Polygala crotalarioides</i> Buch.-Ham. ex DC.                 | 0.03 |
| <i>Polygonum paleaceum</i> Wall. ex Hook.f.                      | 0.06 |
| <i>Polyscias filicifolia</i> (C.Moore ex E.Fourn.) L.H.Bailey    | 0.03 |
| <i>Pontederia crassipes</i> Mart.                                | 0.03 |
| <i>Pothos chinensis</i> (Raf.) Merr.                             | 0.45 |
| <i>Pothos scandens</i> L.                                        | 0.74 |
| <i>Praxelis clematidea</i> (Hieron. ex Kuntze) R.M.King & H.Rob. | 0.06 |
| <i>Protium serratum</i> (Wall. ex Colebr.) Engl.                 | 0.06 |
| <i>Prunus cerasoides</i> Buch.-Ham. ex D.Don                     | 0.10 |
| <i>Pseuderanthemum graciliflorum</i> (Nees) Ridl.                | 0.10 |
| <i>Psidium guajava</i> L.                                        | 0.77 |
| <i>Psophocarpus tetragonolobus</i> (L.) DC.                      | 0.03 |
| <i>Psychotria yunnanensis</i> Hutch.                             | 0.10 |
| <i>Pteridium aquilinum</i> (L.) Kuhn                             | 0.10 |
| <i>Pteridrys syrmatica</i> (Willd.) C.Chr. & Ching               | 0.06 |
| <i>Pterocarpus macrocarpus</i> Kurz                              | 0.06 |
| <i>Pueraria candollei</i> Wall. ex Benth.                        | 0.06 |
| <i>Punica granatum</i> L.                                        | 0.16 |
| <i>Putranjiva roxburghii</i> Wall.                               | 0.06 |
| <i>Raphanus raphanistrum</i> L.                                  | 0.03 |
| <i>Rauvolfia serpentina</i> (L.) Benth. ex Kurz                  | 0.10 |
| <i>Rauvolfia verticillata</i> (Lour.) Baill.                     | 0.16 |
| <i>Rhinacanthus nasutus</i> (L.) Kurz                            | 0.13 |
| <i>Ricinus communis</i> L.                                       | 1.00 |
| <i>Rothea serrata</i> (L.) Steane & Mabb.                        | 0.87 |
| <i>Rubia cordifolia</i> L.                                       | 0.16 |
| <i>Rubus alceifolius</i> Poir.                                   | 0.03 |

|                                                        |      |
|--------------------------------------------------------|------|
| <i>Rubus ellipticus</i> Sm.                            | 0.03 |
| <i>Ruellia tuberosa</i> L.                             | 0.03 |
| <i>Saccharum officinarum</i> L.                        | 0.23 |
| <i>Salacia chinensis</i> L.                            | 0.06 |
| <i>Salacia verrucosa</i> Wight                         | 0.29 |
| <i>Salix tetrasperma</i> Roxb.                         | 0.06 |
| <i>Sambucus canadensis</i> L.                          | 0.48 |
| <i>Sambucus javanica</i> Reinw. ex Blume               | 1.35 |
| <i>Sapindus rarak</i> DC.                              | 0.10 |
| <i>Sarcandra glabra</i> (Thunb.) Nakai                 | 0.16 |
| <i>Sarcosperma arboreum</i> Hook.f.                    | 0.03 |
| <i>Saurauia napaulensis</i> DC.                        | 0.06 |
| <i>Saurauia roxburghii</i> Wall.                       | 0.03 |
| <i>Scadoxus multiflorus</i> (Martyn) Raf.              | 0.03 |
| <i>Scaphium macropodium</i> (Miq.) Beumée ex K.Heyne   | 0.03 |
| <i>Schefflera bengalensis</i> Gamble                   | 0.10 |
| <i>Schefflera leucantha</i> R. Vig.                    | 0.45 |
| <i>Schefflera venulosa</i> (Wight & Arn.) Harms        | 0.03 |
| <i>Schima wallichii</i> (DC.) Korth.                   | 0.84 |
| <i>Schleichera oleosa</i> (Lour.) Oken                 | 0.03 |
| <i>Scleropyrum maingayi</i> Hook.f.                    | 0.03 |
| <i>Scleropyrum pentandrum</i> (Dennst.) Mabb.          | 0.39 |
| <i>Scoparia dulcis</i> L.                              | 1.10 |
| <i>Scurrula ferruginea</i> (Roxb. ex Jack) Danser      | 0.10 |
| <i>Scutellaria indica</i> L.                           | 0.03 |
| <i>Selliguea cruciformis</i> (Ching) Fraser-Jenk.      | 0.06 |
| <i>Senegalia caesia</i> (L.) Maslin, Seigler & Ebinger | 0.16 |
| <i>Senegalia catechu</i> (L.f.) P.J.H.Hurter & Mabb.   | 0.03 |
| <i>Senegalia rugata</i> (Lam.) Britton & Rose          | 0.13 |
| <i>Senna alata</i> (L.) Roxb.                          | 0.77 |
| <i>Senna hirsuta</i> (L.) H.S.Irwin & Barneby          | 0.06 |
| <i>Senna occidentalis</i> (L.) Link                    | 0.32 |
| <i>Senna siamea</i> (Lam.) H.S.Irwin & Barneby         | 0.10 |
| <i>Senna timoriensis</i> (DC.) H.S.Irwin & Barneby     | 0.03 |
| <i>Senna tora</i> (L.) Roxb.                           | 0.13 |
| <i>Sesamum indicum</i> L.                              | 0.06 |
| <i>Setaria parviflora</i> (Poir.) Kerguélen            | 0.03 |
| <i>Shorea obtusa</i> Wall. ex Blume                    | 0.03 |
| <i>Shorea roxburghii</i> G.Don                         | 0.06 |
| <i>Sida acuta</i> Burm.f.                              | 0.61 |
| <i>Sida cordifolia</i> L.                              | 0.10 |
| <i>Sida rhombifolia</i> L.                             | 0.19 |
| <i>Smilax blumei</i> A.DC.                             | 0.03 |



|                                                                 |      |
|-----------------------------------------------------------------|------|
| <i>Smilax corbularia</i> Kunth                                  | 0.35 |
| <i>Smilax glabra</i> Roxb.                                      | 0.32 |
| <i>Smilax griffithii</i> A.DC.                                  | 0.06 |
| <i>Smilax luzonensis</i> C.Presl                                | 0.13 |
| <i>Smilax ovalifolia</i> Roxb. ex D.Don                         | 0.32 |
| <i>Smilax zeylanica</i> L.                                      | 0.03 |
| <i>Sohmaea teres</i> (Wall. ex Benth.) H.Ohashi & K.Ohashi      | 0.03 |
| <i>Solanum aculeatissimum</i> Jacq.                             | 0.03 |
| <i>Solanum americanum</i> Mill.                                 | 0.13 |
| <i>Solanum erianthum</i> D.Don                                  | 0.06 |
| <i>Solanum lasiocarpum</i> Dunal                                | 0.06 |
| <i>Solanum lycopersicum</i> L.                                  | 0.06 |
| <i>Solanum nigrum</i> L.                                        | 0.03 |
| <i>Solanum torvum</i> Sw.                                       | 0.06 |
| <i>Solanum trilobatum</i> L.                                    | 0.03 |
| <i>Solanum violaceum</i> Ortega                                 | 0.32 |
| <i>Solanum virginianum</i> L.                                   | 0.06 |
| <i>Spatholobus parviflorus</i> (Roxb. ex G.Don) Kuntze          | 0.13 |
| <i>Spondias bipinnata</i> Airy Shaw & Forman                    | 0.03 |
| <i>Spondias pinnata</i> (L.f.) Kurz                             | 0.10 |
| <i>Stachytarpheta indica</i> (L.) Vahl                          | 0.03 |
| <i>Stachytarpheta jamaicensis</i> (L.) Vahl                     | 0.16 |
| <i>Stephania japonica</i> (Thunb.) Miers                        | 0.13 |
| <i>Stephania pierrei</i> Diels                                  | 0.06 |
| <i>Stereospermum neuranthum</i> Kurz                            | 0.03 |
| <i>Streblus asper</i> Lour.                                     | 0.13 |
| <i>Streptocaulon juvenas</i> (Lour.) Merr.                      | 0.06 |
| <i>Strobilanthes cusia</i> (Nees) Kuntze                        | 0.26 |
| <i>Strobocalyx arborea</i> (Buch.-Ham.) Sch.Bip.                | 0.03 |
| <i>Strobocalyx solanifolia</i> Sch.Bip.                         | 0.03 |
| <i>Strychnos nux-vomica</i> L.                                  | 0.06 |
| <i>Styrax benzoides</i> Craib                                   | 0.10 |
| <i>Sumbaviopsis albicans</i> (Blume) J.J.Sm.                    | 0.03 |
| <i>Suregada multiflora</i> (A.Juss.) Baill.                     | 0.03 |
| <i>Symphorema involucreatum</i> Roxb.                           | 0.13 |
| <i>Syzygium cumini</i> (L.) Skeels                              | 0.19 |
| <i>Tabernaemontana divaricata</i> (L.) R.Br. ex Roem. & Schult. | 0.06 |
| <i>Tabernaemontana pandacaqui</i> Poir.                         | 0.03 |
| <i>Tacca chantrieri</i> André                                   | 0.06 |
| <i>Tadehagi triquetrum</i> (L.) H.Ohashi                        | 0.81 |
| <i>Tagetes erecta</i> L.                                        | 0.03 |
| <i>Tamarindus indica</i> L.                                     | 0.23 |
| <i>Tarennoidea wallichii</i> (Hook.f.) Tirveng. & Sastre        | 0.03 |

|                                                                       |      |
|-----------------------------------------------------------------------|------|
| <i>Tectaria polymorpha</i> (Wall. ex Hook.) Copel.                    | 0.06 |
| <i>Tectona grandis</i> L.f.                                           | 0.06 |
| <i>Terminalia bellirica</i> (Gaertn.) Roxb.                           | 0.10 |
| <i>Terminalia chebula</i> Retz.                                       | 0.13 |
| <i>Tetrastigma cruciatum</i> Craib & Gagnep.                          | 0.06 |
| <i>Thunbergia coccinea</i> Wall. ex D.Don                             | 0.39 |
| <i>Thunbergia laurifolia</i> Lindl.                                   | 1.10 |
| <i>Thyrsostachys siamensis</i> Gamble                                 | 0.06 |
| <i>Thysanolaena latifolia</i> (Roxb. ex Hornem.) Honda                | 0.19 |
| <i>Tiliacora triandra</i> (Colebr.) Diels                             | 0.03 |
| <i>Tinomisium petiolare</i> Hook. f. & Thomson                        | 0.10 |
| <i>Tinospora baenzigeri</i> Forman                                    | 0.03 |
| <i>Tinospora crispa</i> (L.) Hook. f. & Thomson                       | 1.48 |
| <i>Tinospora sinensis</i> (Lour.) Merr.                               | 0.13 |
| <i>Tithonia diversifolia</i> (Hemsl.) A.Gray                          | 0.32 |
| <i>Toddalia asiatica</i> (L.) Lam.                                    | 0.10 |
| <i>Toona hexandra</i> (Wall.) M.Roem.                                 | 0.03 |
| <i>Torenia fournieri</i> Linden ex E.Fourn.                           | 0.03 |
| <i>Tradescantia spathacea</i> Sw.                                     | 0.03 |
| <i>Trema orientale</i> (L.) Blume                                     | 0.03 |
| <i>Trevesia palmata</i> (Roxb. ex Lindl.) Vis.                        | 0.13 |
| <i>Triadica cochinchinensis</i> Lour.                                 | 0.10 |
| <i>Trichosanthes scabra</i> Lour.                                     | 0.06 |
| <i>Trichosanthes tricuspidata</i> Lour.                               | 0.06 |
| <i>Tridax procumbens</i> L.                                           | 0.03 |
| <i>Tristaniopsis burmanica</i> (Griff.) Peter G.Wilson & J.T.Waterh.  | 0.06 |
| <i>Tropidia angulosa</i> (Lindl.) Blume                               | 0.03 |
| <i>Tupistra muricata</i> (Gagnep.) N.Tanaka                           | 0.06 |
| <i>Typhonium trilobatum</i> (L.) Schott                               | 0.03 |
| <i>Uncaria laevigata</i> Wall. ex G.Don                               | 0.06 |
| <i>Uraria cordifolia</i> Wall.                                        | 0.03 |
| <i>Urena lobata</i> L.                                                | 0.03 |
| <i>Uvaria siamensis</i> (Scheff.) L.L.Zhou, Y.C.F.Su & R.M.K.Saunders | 0.03 |
| <i>Vaccinium sprengelii</i> (G.Don) Sleumer ex Rehder                 | 0.16 |
| <i>Ventilago denticulata</i> Willd.                                   | 0.19 |
| <i>Ventilago harmandiana</i> Pierre                                   | 0.06 |
| <i>Verbena officinalis</i> L.                                         | 0.19 |
| <i>Viburnum sambucinum</i> Reinw. ex Blume                            | 0.03 |
| <i>Vigna dalzelliana</i> (Kuntze) Verdc.                              | 0.03 |
| <i>Viscum articulatum</i> Burm.f.                                     | 0.06 |
| <i>Vitex peduncularis</i> Wall. ex Schauer                            | 0.16 |
| <i>Vitex trifolia</i> L.                                              | 0.23 |
| <i>Walsura robusta</i> Roxb.                                          | 0.03 |

|                                                            |      |
|------------------------------------------------------------|------|
| <i>Wrightia arborea</i> (Dennst.) Mabb.                    | 0.03 |
| <i>Wurfbainia testacea</i> (Ridl.) Skornick. & A.D.Poulsen | 0.03 |
| <i>Wurfbainia villosa</i> (Lour.) Skornick. & A.D.Poulsen  | 0.03 |
| <i>Xantolis cambodiana</i> (Pierre ex Dubard) P.Royen      | 0.42 |
| <i>Xylia xylocarpa</i> (Roxb.) W.Theob.                    | 0.10 |
| <i>Zanthoxylum rhetsa</i> (Roxb.) DC.                      | 0.03 |
| <i>Zephyranthes candida</i> (Lindl.) Herb.                 | 0.03 |
| <i>Zephyranthes rosea</i> Lindl.                           | 0.06 |
| <i>Zingiber latifolium</i> Theilade & Mood                 | 0.06 |
| <i>Zingiber montanum</i> (J.Koenig) Link ex A.Dietr.       | 0.52 |
| <i>Zingiber officinale</i> Roscoe                          | 0.16 |
| <i>Zingiber ottensii</i> Valetton                          | 1.10 |
| <i>Zingiber rubens</i> Roxb.                               | 0.03 |
| <i>Zingiber zerumbet</i> (L.) Roscoe ex Sm.                | 0.13 |
| <i>Ziziphus cambodiana</i> Pierre                          | 0.32 |

**Table S2** Number of use reports for each symptom/treatment/uses of the top ten most used plant species by Karen in Thailand

| <b>Symptoms/treatments/uses</b> | <b><i>Biancaea sappan</i></b> | <b><i>Chromolaena odorata</i></b> | <b><i>Elephantopus scaber</i></b> | <b><i>Mimosa pigra</i></b> | <b><i>Ricinus communis</i></b> | <b><i>Sambucus javanica</i></b> | <b><i>Scoparia dulcis</i></b> | <b><i>Thunbergia laurifolia</i></b> | <b><i>Tinospora crispa</i></b> | <b><i>Zingiber ottensii</i></b> |
|---------------------------------|-------------------------------|-----------------------------------|-----------------------------------|----------------------------|--------------------------------|---------------------------------|-------------------------------|-------------------------------------|--------------------------------|---------------------------------|
| Abdominal pain                  | 1                             |                                   |                                   |                            |                                |                                 |                               |                                     |                                | 5                               |
| Abscess                         |                               |                                   |                                   |                            |                                |                                 | 1                             |                                     |                                |                                 |
| Abstergent                      |                               |                                   |                                   |                            |                                |                                 | 1                             |                                     |                                |                                 |
| Alcohol detoxication            |                               |                                   |                                   |                            |                                |                                 |                               | 2                                   |                                |                                 |
| Amniotic fluid elimination      | 2                             |                                   |                                   |                            |                                |                                 |                               |                                     |                                |                                 |
| Analeptic                       |                               |                                   | 1                                 |                            |                                |                                 |                               |                                     |                                | 1                               |
| Anthelmintics                   |                               |                                   |                                   |                            |                                |                                 |                               |                                     | 3                              |                                 |
| Antidote                        |                               | 1                                 |                                   |                            |                                |                                 | 1                             | 2                                   |                                |                                 |
| Anuria                          |                               | 1                                 | 4                                 | 4                          |                                | 1                               |                               |                                     |                                |                                 |
| Aphrodisiac                     |                               |                                   |                                   |                            |                                | 1                               |                               |                                     |                                |                                 |
| Appetite stimulant              | 1                             |                                   |                                   |                            |                                |                                 |                               |                                     | 5                              |                                 |
| Asthma                          | 1                             | 1                                 |                                   |                            |                                |                                 |                               | 1                                   |                                |                                 |
| Athlete's foot                  |                               | 1                                 |                                   |                            |                                |                                 | 1                             |                                     |                                |                                 |
| Back and waist pain             | 4                             | 1                                 | 1                                 |                            |                                |                                 |                               |                                     |                                |                                 |
| Bloat                           |                               |                                   |                                   |                            |                                |                                 |                               | 1                                   | 1                              | 1                               |
| Blood pressure                  |                               |                                   |                                   |                            |                                |                                 | 1                             |                                     |                                |                                 |
| Blood tonic                     | 6                             |                                   |                                   | 2                          |                                |                                 |                               |                                     | 2                              |                                 |
| Body recovery from sickness     |                               |                                   | 1                                 | 1                          |                                |                                 |                               |                                     |                                |                                 |





|                      |           |           |           |           |           |           |           |           |           |           |
|----------------------|-----------|-----------|-----------|-----------|-----------|-----------|-----------|-----------|-----------|-----------|
| Urinary stones       |           | 1         | 1         | 4         | 1         |           | 1         |           |           |           |
| Venomous snake bites |           |           |           |           |           |           |           | 1         |           |           |
| Wounds               | 1         | 7         |           |           | 1         | 2         | 9         |           | 1         |           |
| <b>Total</b>         | <b>49</b> | <b>50</b> | <b>39</b> | <b>30</b> | <b>31</b> | <b>42</b> | <b>34</b> | <b>34</b> | <b>46</b> | <b>34</b> |

**Table S3** CI values of medicinal plants families used by Karen in Thailand

| <b>Fam</b>        | <b>CI</b> |
|-------------------|-----------|
| Acanthaceae       | 3.32      |
| Acoraceae         | 0.77      |
| Actinidiaceae     | 0.10      |
| Adoxaceae         | 0.48      |
| Alismataceae      | 0.03      |
| Amaranthaceae     | 0.42      |
| Amaryllidaceae    | 0.45      |
| Anacardiaceae     | 0.45      |
| Annonaceae        | 1.29      |
| Apiaceae          | 0.87      |
| Apocynaceae       | 2.68      |
| Aquifoliaceae     | 0.03      |
| Araceae           | 1.32      |
| Araliaceae        | 1.13      |
| Arecaceae         | 0.19      |
| Aristolochiaceae  | 0.13      |
| Asparagaceae      | 1.52      |
| Aspleniaceae      | 0.10      |
| Asteraceae        | 7.13      |
| Athyriaceae       | 0.06      |
| Balsaminaceae     | 0.06      |
| Basellaceae       | 0.19      |
| Berberidaceae     | 0.03      |
| Betulaceae        | 0.68      |
| Bignoniaceae      | 1.48      |
| Bixaceae          | 0.03      |
| Boraginaceae      | 0.10      |
| Brassicaceae      | 0.03      |
| Bromeliaceae      | 0.03      |
| Burseraceae       | 0.10      |
| Buxaceae          | 0.03      |
| Campanulaceae     | 0.16      |
| Cannabaceae       | 0.48      |
| Cannaceae         | 0.23      |
| Capparaceae       | 0.19      |
| Cardiopteridaceae | 0.06      |

|                  |       |
|------------------|-------|
| Caricaceae       | 0.10  |
| Caryophyllaceae  | 0.10  |
| Celastraceae     | 0.55  |
| Chloranthaceae   | 0.84  |
| Clusiaceae       | 0.06  |
| Colchicaceae     | 0.03  |
| Combretaceae     | 0.58  |
| Commelinaceae    | 0.10  |
| Connaraceae      | 0.10  |
| Convolvulaceae   | 0.39  |
| Costaceae        | 0.58  |
| Crassulaceae     | 0.16  |
| Cucurbitaceae    | 0.58  |
| Cycadaceae       | 0.03  |
| Cyperaceae       | 0.13  |
| Dennstaedtiaceae | 0.16  |
| Dilleniaceae     | 0.10  |
| Dioscoreaceae    | 0.19  |
| Dipterocarpaceae | 0.23  |
| Ebenaceae        | 0.26  |
| Elaeagnaceae     | 0.03  |
| Equisetaceae     | 0.55  |
| Ericaceae        | 0.23  |
| Euphorbiaceae    | 4.39  |
| Gentianaceae     | 0.06  |
| Gnetaceae        | 0.10  |
| Hernandiaceae    | 0.19  |
| Hypericaceae     | 0.48  |
| Hypoxidaceae     | 0.29  |
| Icacinaceae      | 0.03  |
| Iridaceae        | 0.48  |
| Juglandaceae     | 0.13  |
| Lamiaceae        | 4.35  |
| Lauraceae        | 1.84  |
| Lecythidaceae    | 0.16  |
| Leguminosae      | 11.87 |
| Liliaceae        | 0.06  |
| Linderniaceae    | 0.03  |
| Loganiaceae      | 0.06  |
| Loranthaceae     | 0.29  |
| Lycopodiaceae    | 0.06  |
| Lygodiaceae      | 0.45  |
| Lythraceae       | 0.48  |

|                 |      |
|-----------------|------|
| Magnoliaceae    | 0.03 |
| Malpighiaceae   | 0.35 |
| Malvaceae       | 1.68 |
| Marantaceae     | 0.16 |
| Marattiaceae    | 0.32 |
| Martyniaceae    | 0.06 |
| Melanthiaceae   | 0.42 |
| Melastomataceae | 0.74 |
| Meliaceae       | 0.65 |
| Menispermaceae  | 2.68 |
| Molluginaceae   | 0.03 |
| Moraceae        | 1.48 |
| Moringaceae     | 0.03 |
| Muntingiaceae   | 0.03 |
| Musaceae        | 0.65 |
| Myristicaceae   | 0.03 |
| Myrsinaceae     | 0.10 |
| Myrtaceae       | 1.03 |
| Nyctaginaceae   | 0.03 |
| Nymphaeaceae    | 0.03 |
| Ochnaceae       | 0.35 |
| Olacaceae       | 0.03 |
| Oleaceae        | 0.32 |
| Onagraceae      | 0.03 |
| Orchidaceae     | 0.45 |
| Orobanchaceae   | 0.10 |
| Oxalidaceae     | 0.19 |
| Pandanaceae     | 0.10 |
| Papaveraceae    | 0.23 |
| Passifloraceae  | 0.10 |
| Pedaliaceae     | 0.06 |
| Phyllanthaceae  | 2.06 |
| Phytolaccaceae  | 0.03 |
| Pinaceae        | 0.10 |
| Piperaceae      | 1.23 |
| Plantaginaceae  | 2.00 |
| Plumbaginaceae  | 0.71 |
| Poaceae         | 2.45 |
| Polygalaceae    | 0.45 |
| Polygonaceae    | 0.19 |
| Polypodiaceae   | 0.45 |
| Pontederiaceae  | 0.03 |
| Primulaceae     | 0.58 |



|                  |      |
|------------------|------|
| Proteaceae       | 0.29 |
| Putranjivaceae   | 0.06 |
| Ranunculaceae    | 0.16 |
| Rhamnaceae       | 0.68 |
| Rosaceae         | 0.16 |
| Rubiaceae        | 2.39 |
| Rutaceae         | 2.23 |
| Salicaceae       | 0.48 |
| Santalaceae      | 0.71 |
| Sapindaceae      | 0.58 |
| Sapotaceae       | 0.45 |
| Saururaceae      | 0.23 |
| Scrophulariaceae | 0.39 |
| Simaroubaceae    | 0.65 |
| Smilacaceae      | 1.26 |
| Solanaceae       | 1.23 |
| Staphyleaceae    | 0.16 |
| Styracaceae      | 0.10 |
| Taccaceae        | 0.03 |
| Tectariaceae     | 0.06 |
| Theaceae         | 0.97 |
| Thymelaeaceae    | 0.06 |
| Urticaceae       | 0.06 |
| Verbenaceae      | 0.48 |
| Viburnaceae      | 1.39 |
| Vitaceae         | 1.06 |
| Xanthorrhoeaceae | 0.35 |
| Zingiberaceae    | 5.06 |

---
